# Supplementary material for: Abnormal NFAT5 Physiology in Duchenne Muscular Dystrophy Fibroblasts as a Putative Explanation for the Permanent Fibrosis Formation in Duchenne Muscular Dystrophy
Source: MDPI journal article supplement (doi:10.3390/ijms21217888), 2020-10-24
Supplement: s1 [file s1]

**Supplementary Table 1. Cell culture data**

| Primary fibroblast culture | Status  | Provided by | Age (years) | Gender | Mutation/ Deletion               |
|----------------------------|---------|-------------|-------------|--------|----------------------------------|
| UFibro                     | Healthy | Myobank (F) | 17          | Male   | NA                               |
| DMDFibro                   | DMD     | Myobank (F) | Unknown     | Male   | Exon 24<br>(mutation stop codon) |

DMD= Duchenne muscular dystrophy.

**Supplementary Table 2. Genes used in RT-qPCR**

| Gene   | Primer                                                     | Concentration        | Source     |
|--------|------------------------------------------------------------|----------------------|------------|
| NFAT5  | PrimePCR SYBRGreen Assay<br>qHsaCID0015734 intron-spanning | 1x                   | Bio-Rad    |
| UBC    | F:ATTTGGGTCGCGGTTCTTG<br>R:TGCCTTGACATTCTCGATGGT           | 1,25pmol<br>1,25pmol | IDT<br>IDT |
| HPRT1  | F: TGACACTGGCAAAACAATGCA<br>R: GGTCCTTTTCACCAGCAAGCT       | 1,25pmol<br>1,25pmol | IDT<br>IDT |
| B2M    | F:TGCTGTCTCCATGTTTGATGTATCT<br>R: TCTCTGCTCCCCACCTCTAAGT   | 1,25pmol<br>1,25pmol | IDT<br>IDT |
| RPL13A | F:CCTGGAGGAGAAGAGGAAAGAGA<br>R:CCTGGAGGAGAAGAGGAAAGAGA     | 1,25pmol<br>1,25pmol | IDT<br>IDT |
| YWHAZ  | F:ACTTTTGGTACATTGTGGCTTCAA<br>R: CCGCCAGGACAAACCAGTAT      | 1,25pmol<br>1,25pmol | IDT<br>IDT |
| SDHA   | F: TGGGAACAAGAGGGCATCTG<br>R: CCACCACTGCATCAAATTCATG       | 1,25pmol<br>1,25pmol | IDT<br>IDT |
| HMBS   | F: GGCAATGCGGCTGCAA<br>R: GGGTACCCACGCGAATCAC              | 1,25pmol<br>1,25pmol | IDT<br>IDT |
| TBP    | Unknown                                                    | 1,25pmol             | [27]       |
| AluSq  | Unknown                                                    | 1,25pmol             | [27]       |
| AluSx1 | Unknown                                                    | 1,25pmol             | [27]       |

*UBC*= ubiquitin C; *HPRT1*= hypoxanthine phosphoribosyltransferase 1; *B2M*= beta-2 microglobulin; *RPL13A*= 60S ribosomal protein L13a; *YWHAZ*= Tyrosine 3-Mono-oxygenase/Tryptophan 5-Mono-oxygenase Activation Protein, Zeta; *SDHA*= Succinate dehydrogenase complex, subunit A, *HMBS*= hydroxymethylbilane synthase, *TBP*= TATA-binding protein, *AluSq*= Alu restriction enzym, *AluSx1*= interspersed repeat subfamily. *NFAT5*= Nuclear Factor of Activated T-cells 5.

**Supplementary Table 3. Primary antibodies used in Western-blotting**

| Antigen | Primary antibody       | Clone | Concentration | Source        |
|---------|------------------------|-------|---------------|---------------|
| GAPDH   | Mouse monoclonal IgM   | 71.1  | 0.4µg/mL      | Sigma-Aldrich |
| NFAT5   | Mouse monoclonal IgG2a | F-9   | 2µg/mL        |               |

NFAT5= Nuclear Factor of Activated T-cells 5.

**Supplementary Table 4. Primary antibodies used in immunocytochemistry**

| Antigen      | Primary antibody    | Clone | Concentration | Source                   |
|--------------|---------------------|-------|---------------|--------------------------|
| NFAT5 (V-18) | Goat polyclonal IgG | /     | 10 µg/mL      | Santa-Cruz Biotechnology |

NFAT5= Nuclear Factor of Activated T-cells 5; NCAM= neural cell adhesion molecule.
