# Supplementary figures and images for: Abnormal NFAT5 Physiology in Duchenne Muscular Dystrophy Fibroblasts as a Putative Explanation for the Permanent Fibrosis Formation in Duchenne Muscular Dystrophy
Source: MDPI journal article supplement (doi:10.3390/ijms21217888), 2020-10-24

Supplementary Figure 2: Testing of NFAT5 Mouse specificity using siRNA

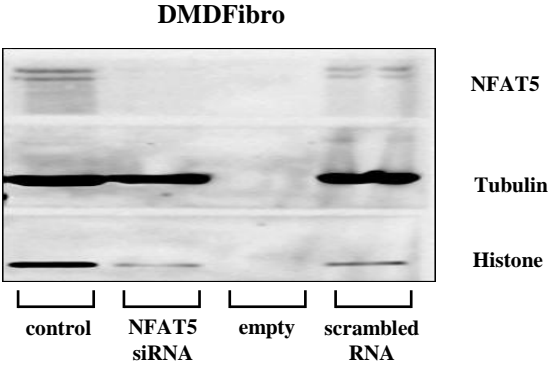

Supplement: s1 [file s1]

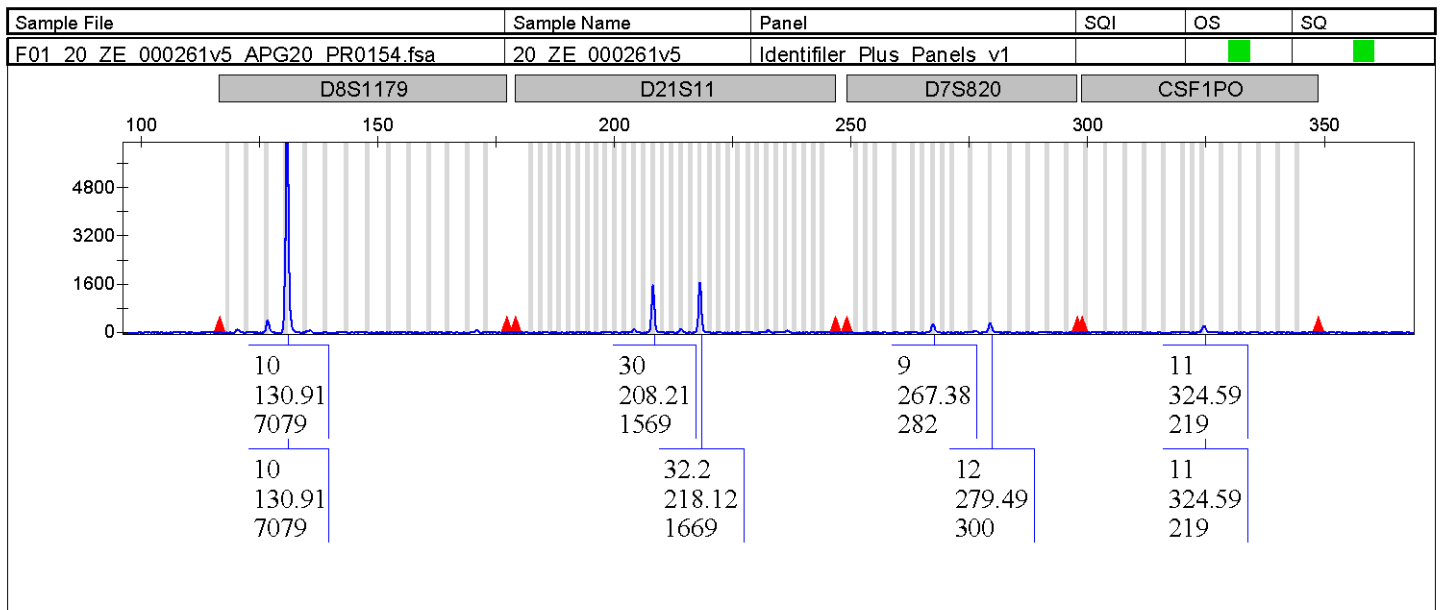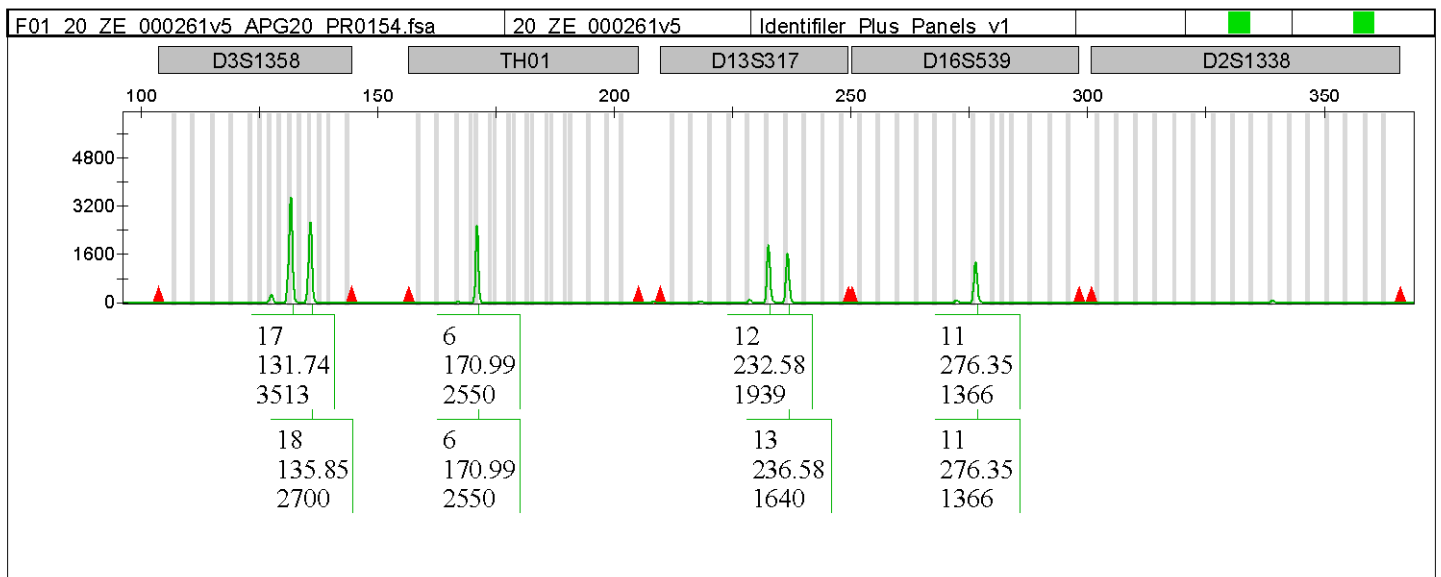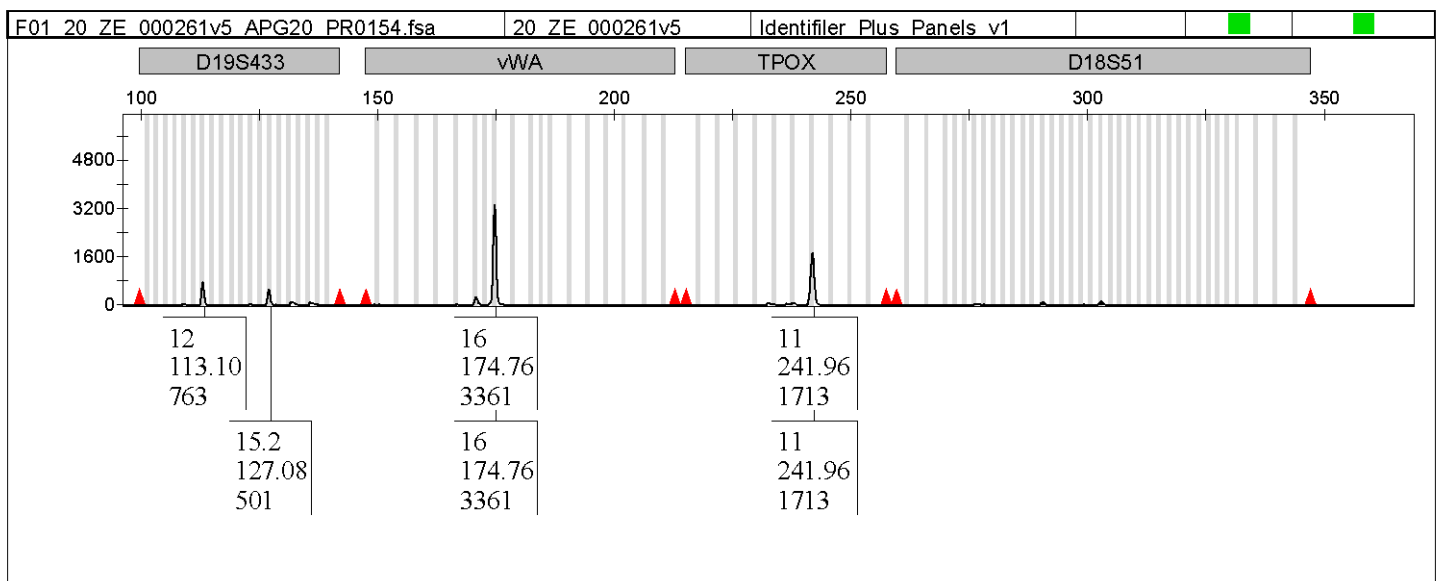



| Sample File                         | Sample Name    | Panel                      | SQI | OS                                                                                  | SQ                                                                                  |
|-------------------------------------|----------------|----------------------------|-----|-------------------------------------------------------------------------------------|-------------------------------------------------------------------------------------|
| F01 20 ZE 000261v5 APG20 PR0154.fsa | 20 ZE 000261v5 | Identifiler Plus Panels v1 |     |  |  |

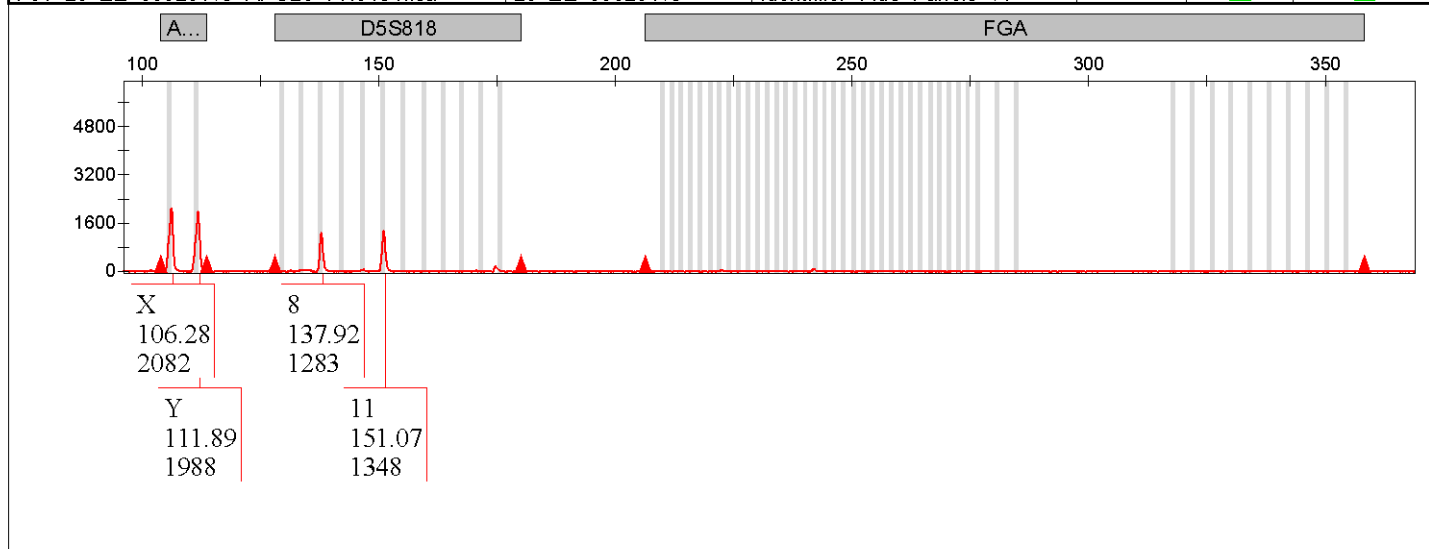

Supplement: s1 [file s1]
